# Supplementary material for: Efficient Degradation of Tetracycline Antibiotics by Engineered Myoglobin with High Peroxidase Activity
Source: MDPI journal article supplement (doi:10.3390/molecules27248660), 2022-12-07
Supplement: s1 [file s1]

## Supporting Information

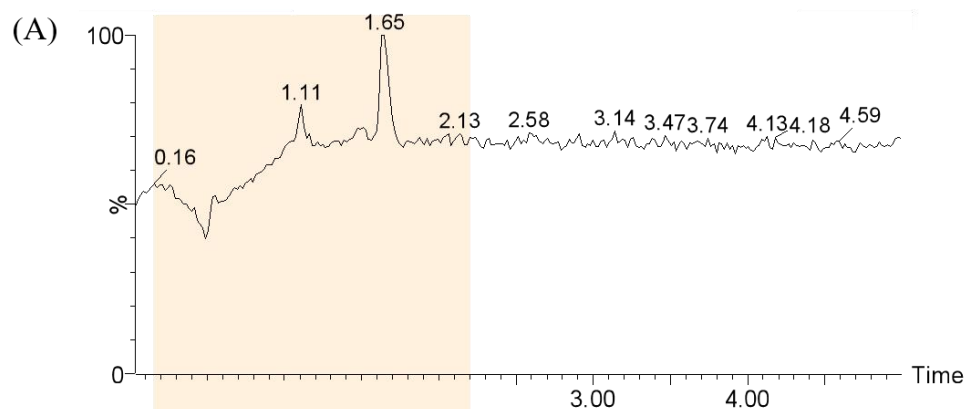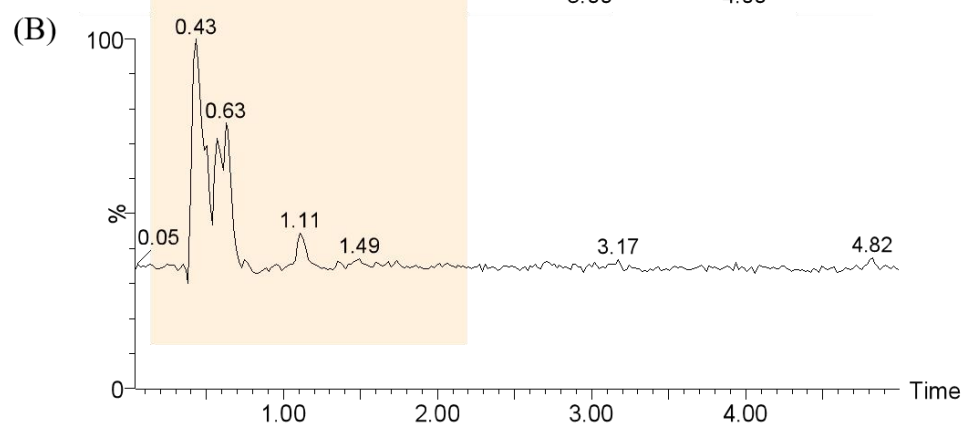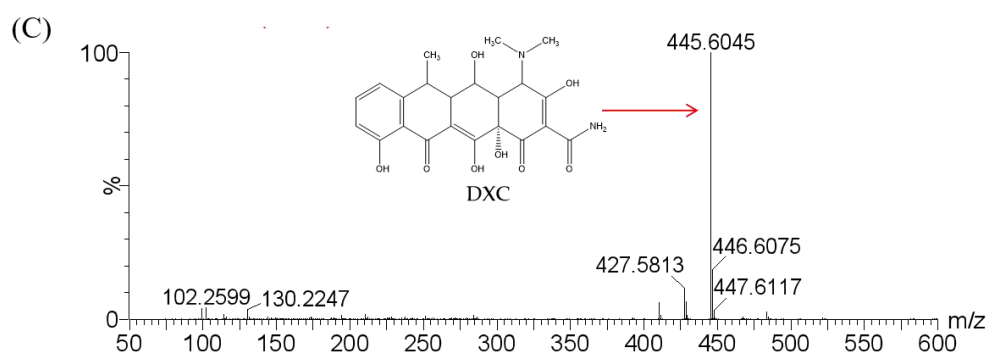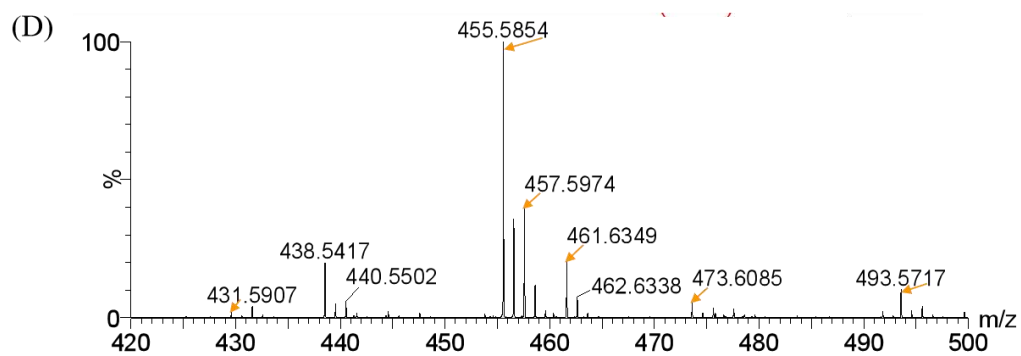

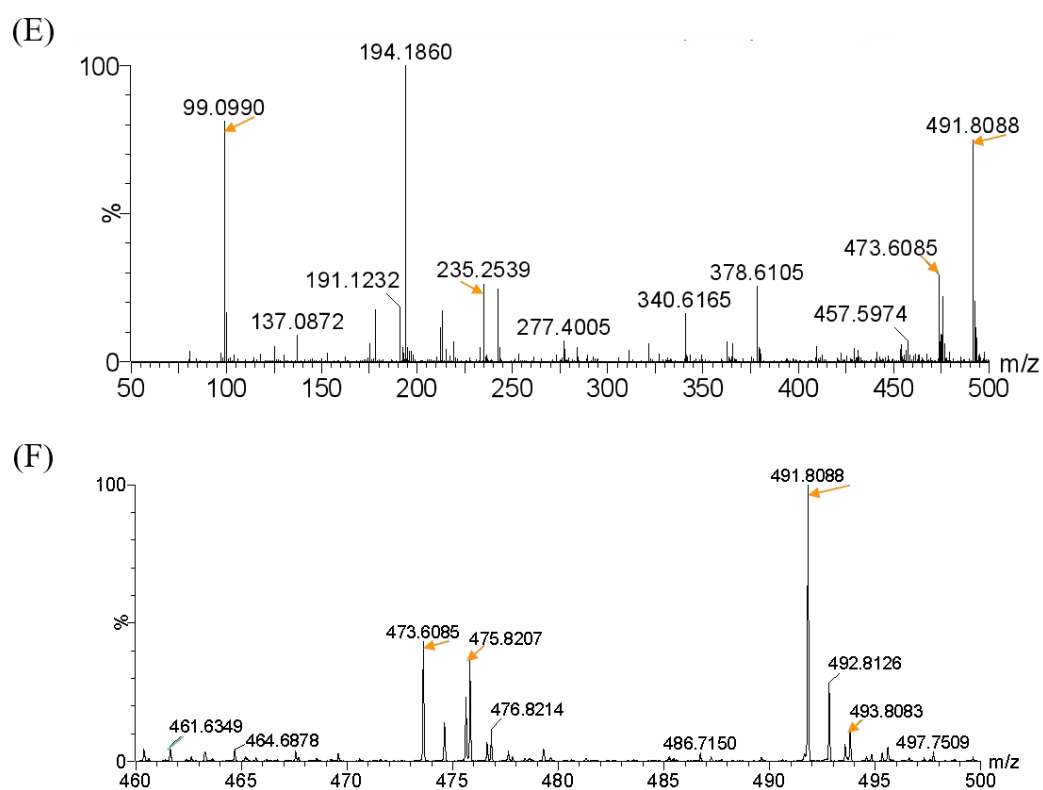

**Figure S1.** UPLC-MS traces of the oxidation of DXC (100  $\mu$ M) in the presence (A) and absence (B) of F43Y/P88W/F138W Mb (5  $\mu$ M) with  $\text{H}_2\text{O}_2$  (0.4 mM) as an oxidant. (C) ESI-MS spectra of DXC. (D-F) Analysis of the oxidation products by ESI-MS spectrometry in a positive mode. Detected products are indicated by orange arrows.
